# Supplementary material for: An electrochemical microRNA sensing platform based on tungsten diselenide nanosheets and competitive RNA–RNA hybridization
Source: Royal Society of Chemistry journal article supplement (doi:10.1039/c7an01244f), 2017-01-01
Supplement: c7an01244f1.pdf [file c7an01244f1.pdf]

### Supporting Information

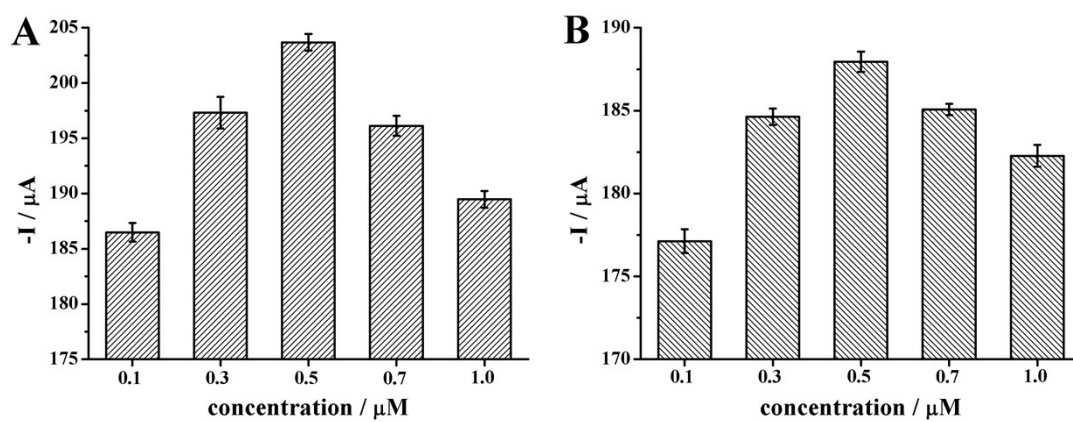

**Fig. S1.** The influence of concentration of SH-RNA (A) and streptavidin-HRP (B) on peak current.
